# Supplementary material for: Genome-Wide Identification, Expression and Interaction Analyses of PP2C Family Genes in Chenopodium quinoa
Source: MDPI journal article supplement (doi:10.3390/genes15010041), 2023-12-27
Supplement: s1 [file Tables S1-S6.xlsx]

## Sheet: Table S1
Table S1. The list of 117 CqPP2C genes and their basic characterizations
Gene name	Sequence ID	Genomic Position	Protein Length	MW	pI	Instability index	Grand average of hydropathicity	Subcellular
CqPP2C1	AUR62043416	Chr00:213145-226846	522	57555.1	5.87	39.7	-0.44	Nucleus
CqPP2C2	AUR62021294	Chr00:36596767-36598809	341	37962.2	5.11	55.06	-0.192	Nucleus
CqPP2C3	AUR62043572	Chr00:73741550-73743172	354	38953	6.36	35.79	-0.371	Chloroplast
CqPP2C4	AUR62042678	Chr00:122715474-122721142	473	51567.9	5.11	44.9	-0.321	Chloroplast
CqPP2C5	AUR62021414	Chr01:17602050-17608082	359	38776.6	5.33	64.82	-0.219	Chloroplast
CqPP2C6	AUR62021446	Chr01:18153424-18162928	1077	119763	5.16	43.84	-0.24	Plasma membrane
CqPP2C7	AUR62031279	Chr01:24371810-24375708	230	25654.4	8.28	49.38	0.02	Mitochondrion
CqPP2C8	AUR62031291	Chr01:24872919-24883090	896	97203.2	4.08	39.93	-0.304	Chloroplast
CqPP2C9	AUR62041457	Chr01:27789162-27792501	372	41277.5	4.95	43.61	-0.328	Nucleus
CqPP2C10	AUR62024858	Chr01:45406232-45412240	379	41566.3	5.12	57.72	-0.187	Cytosol
CqPP2C11	AUR62024798	Chr01:46310582-46320728	370	40483.2	4.9	38.86	-0.483	Chloroplast
CqPP2C12	AUR62043800	Chr01:99737850-99742082	389	43076.3	8.11	34.68	-0.239	Chloroplast
CqPP2C13	AUR62043535	Chr01:100893556-100897810	389	43076.3	8.11	34.68	-0.239	Chloroplast
CqPP2C14	AUR62009182	Chr01:108563515-108570198	356	39089.8	7.53	37.15	-0.236	Cytosol
CqPP2C15	AUR62009183	Chr01:108572337-108576544	333	36164.9	4.87	30.49	-0.159	Cytosol
CqPP2C16	AUR62009184	Chr01:108580682-108583610	311	34017.5	5.59	43.42	-0.195	Cytosol
CqPP2C17	AUR62009185	Chr01:108586022-108587558	307	33538.5	4.75	44.08	-0.123	Cytosol
CqPP2C18	AUR62029020	Chr02:36255041-36259698	429	46967.9	4.58	39.14	-0.32	Cytosol
CqPP2C19	AUR62029021	Chr02:36281882-36288494	552	60403.3	5.31	47.73	-0.312	Chloroplast
CqPP2C20	AUR62027354	Chr02:39071009-39075249	469	52081.4	6.94	48.97	-0.117	Chloroplast
CqPP2C21	AUR62027374	Chr02:39556502-39572346	1014	110548	4.18	36.11	-0.366	Cytosol
CqPP2C22	AUR62010911	Chr02:54194336-54200243	350	37862.9	5.69	53.95	-0.14	Chloroplast
CqPP2C23	AUR62010934	Chr02:54510257-54519140	1077	119888	5.12	43.29	-0.235	Nucleus
CqPP2C24	AUR62011247	Chr02:58814647-58817890	343	37758.8	5.02	48.54	-0.228	Cytosol
CqPP2C25	AUR62035145	Chr03:1337833-1342429	399	43538.2	5.04	52.29	-0.252	Cytosol
CqPP2C26	AUR62042174	Chr03:35818616-35824253	415	45367.4	5.15	40.83	-0.292	Chloroplast
CqPP2C27	AUR62013466	Chr03:66397263-66403504	317	34141	4.92	40.12	-0.301	Chloroplast
CqPP2C28	AUR62013380	Chr03:68156287-68159875	357	39323.1	5.09	44.64	-0.269	Nucleus
CqPP2C29	AUR62027768	Chr03:69154163-69158577	235	25883.4	5.42	40.91	-0.303	Cytosol
CqPP2C30	AUR62012136	Chr03:80195397-80197193	400	44097.9	5.99	49.65	-0.47	Cytosol
CqPP2C31	AUR62022905	Chr04:2540608-2542229	354	38953	6.36	35.79	-0.371	Chloroplast
CqPP2C32	AUR62040699	Chr04:4820812-4822658	400	44102.8	5.83	50.66	-0.542	Nucleus
CqPP2C33	AUR62022042	Chr04:12406486-12408190	303	33192.2	5.08	32.81	-0.087	Cytosol
CqPP2C34	AUR62022043	Chr04:12411435-12417209	331	36603.6	6.01	35.44	-0.189	Chloroplast
CqPP2C35	AUR62022044	Chr04:12424725-12430690	341	36829.5	7.13	46.32	-0.331	Nucleus
CqPP2C36	AUR62035985	Chr04:22834089-22835808	213	23647.2	8.73	36.66	-0.209	Cytosol
CqPP2C37	AUR62037693	Chr04:51204705-51212817	322	34805.4	5.16	37.7	-0.483	Nucleus
CqPP2C38	AUR62032363	Chr04:51870195-51876019	379	41540.2	5.24	54.04	-0.219	Cytosol
CqPP2C39	AUR62032423	Chr04:52809508-52819846	370	40581.4	4.95	39.42	-0.494	Nucleus
CqPP2C40	AUR62036176	Chr05:11514867-11516935	287	31782.8	5.79	28.97	-0.461	Cytosol
CqPP2C41	AUR62005240	Chr05:72537068-72542680	358	39958.6	5.87	35.35	-0.273	Cytosol
CqPP2C42	AUR62005248	Chr05:72599326-72606928	427	45562.1	6.34	35.43	-0.079	Chloroplast
CqPP2C43	AUR62006647	Chr05:77379464-77385237	467	51575	5.28	33.25	-0.411	Chloroplast
CqPP2C44	AUR62019358	Chr05:79626242-79629026	310	34639.4	5.7	45.23	-0.35	Cytosol
CqPP2C45	AUR62019354	Chr05:79693790-79703648	480	53538.8	5.07	54.26	-0.609	Chloroplast
CqPP2C46	AUR62024253	Chr06:948641-952242	530	58761.2	8.52	54.73	-0.487	Chloroplast
CqPP2C47	AUR62003181	Chr06:11067530-11070878	420	44962.6	8.23	36.71	-0.108	Chloroplast
CqPP2C48	AUR62002830	Chr06:19660912-19671992	997	110320	7.6	37.75	-0.221	Chloroplast
CqPP2C49	AUR62026415	Chr06:70628422-70639453	359	39905.4	5.95	44.47	-0.071	Chloroplast
CqPP2C50	AUR62040725	Chr07:2863742-2869857	418	45553.8	4.96	35.9	-0.349	Nucleus
CqPP2C51	AUR62041206	Chr07:20808427-20816102	609	66599.7	5.4	45.8	-0.031	Endoplasmic reticulum
CqPP2C52	AUR62012034	Chr07:49946238-49949393	345	38628.1	6.19	49.27	-0.234	Cytosol
CqPP2C53	AUR62038174	Chr07:55427063-55440298	442	48223.6	5.97	34.99	-0.331	Nucleus
CqPP2C54	AUR62002155	Chr07:66411729-66413008	227	25696.2	5.22	41.89	-0.403	Nucleus
CqPP2C55	AUR62006071	Chr07:71146413-71150069	390	42889.6	5.78	44.04	-0.203	Chloroplast
CqPP2C56	AUR62006130	Chr07:71844117-71846770	357	39111.5	5.79	43.46	-0.292	Cytosol
CqPP2C57	AUR62006135	Chr07:71909094-71928476	550	60942.9	5.09	49.33	-0.328	Vacular membrane
CqPP2C58	AUR62016222	Chr07:75638843-75644933	378	41842.5	6.44	41.56	-0.235	Chloroplast
CqPP2C59	AUR62016166	Chr07:76196526-76202958	450	50138.3	8.26	40.62	-0.203	Cytosol
CqPP2C60	AUR62018399	Chr07:86987470-86997599	669	73640.1	6.08	38.56	-0.128	Chloroplast
CqPP2C61	AUR62006287	Chr07:88726519-88730450	410	45742.3	5.85	44.46	-0.486	Nucleus
CqPP2C62	AUR62006431	Chr07:91078220-91080460	586	64846.8	5.05	48.26	-0.426	Nucleus
CqPP2C63	AUR62001620	Chr07:102700836-102703197	355	38712.9	5.55	51.74	-0.27	Chloroplast
CqPP2C64	AUR62001731	Chr07:103732775-103735183	435	47801.7	4.91	50.89	-0.285	Cytosol
CqPP2C65	AUR62001792	Chr07:104385118-104388161	685	75513.6	5.31	39.64	-0.469	Nucleus
CqPP2C66	AUR62025544	Chr07:109182442-109192755	270	29897.1	7.15	38.73	-0.294	Chloroplast
CqPP2C67	AUR62011742	Chr08:524414-527278	379	41627.1	4.82	50.74	-0.131	Nucleus
CqPP2C68	AUR62011976	Chr08:3200688-3214676	761	86088.8	5.2	42.76	-0.421	Cytosol
CqPP2C69	AUR62029842	Chr08:33532292-33535994	142	15587.3	4.31	39.72	-0.541	Cytosol
CqPP2C70	AUR62029933	Chr08:38272878-38281794	186	20442.5	9.44	47.97	-0.103	Cytosol
CqPP2C71	AUR62024575	Chr09:12511107-12513894	359	39520.7	4.79	50.64	-0.112	Nucleus
CqPP2C72	AUR62032285	Chr09:13845797-13871582	1002	112853	5.38	43.88	-0.322	Endoplasmic reticulum
CqPP2C73	AUR62032286	Chr09:13872403-13876330	408	45494.8	5.34	41.89	-0.104	Endoplasmic reticulum
CqPP2C74	AUR62018923	Chr10:11483635-11487977	280	30720.8	6.32	37.24	-0.361	Cytosol
CqPP2C75	AUR62038533	Chr10:17381415-17385145	362	39875	5.41	40.74	-0.295	Cytosol
CqPP2C76	AUR62007666	Chr10:19220073-19226197	327	35511.6	5.09	43.17	-0.303	Chloroplast
CqPP2C77	AUR62022420	Chr10:28905465-28910844	440	47892.6	5.36	46.01	-0.141	Chloroplast
CqPP2C78	AUR62042584	Chr10:58941843-58946277	397	43385.1	5.04	55.63	-0.229	Cytosol
CqPP2C79	AUR62021044	Chr11:2812481-2821288	668	73550.8	5.89	36.64	-0.15	Cytosol
CqPP2C80	AUR62015370	Chr11:19123013-19126901	329	36828.9	6.49	47.72	-0.29	Chloroplast
CqPP2C81	AUR62040380	Chr11:32215318-32221459	418	45568.7	4.96	39.22	-0.399	Nucleus
CqPP2C82	AUR62040374	Chr11:33179122-33186041	530	57852.5	5.14	46.05	-0.127	Chloroplast
CqPP2C83	AUR62035556	Chr11:60085311-60089045	391	43004.7	5.48	44.97	-0.22	Mitochondrion
CqPP2C84	AUR62035082	Chr11:73597441-73605420	825	91326.7	7.57	37.78	-0.188	Chloroplast
CqPP2C85	AUR62039266	Chr11:74267770-74274129	390	43316.2	7.35	37.21	-0.225	Chloroplast
CqPP2C86	AUR62000300	Chr12:3465118-3471401	467	51451.8	5.41	34.76	-0.415	Chloroplast
CqPP2C87	AUR62000715	Chr12:8199703-8204523	427	45617.1	6.77	34.67	-0.123	Chloroplast
CqPP2C88	AUR62000724	Chr12:8282196-8287727	358	39926.6	6.1	38.82	-0.281	Cytosol
CqPP2C89	AUR62019501	Chr12:48561359-48564921	369	41461.3	7.19	36.48	-0.405	Chloroplast
CqPP2C90	AUR62019453	Chr12:49462895-49467680	286	31562.5	5.68	23.79	-0.436	Cytosol
CqPP2C91	AUR62020310	Chr12:56931549-56947015	890	100989	6.46	43.66	-0.449	Nucleus
CqPP2C92	AUR62007253	Chr13:3109537-3117485	698	77344.2	5.21	44.69	-0.497	Nucleus
CqPP2C93	AUR62010835	Chr13:6974822-6975337	171	19043.6	5.97	43.45	-0.17	Cytosol
CqPP2C94	AUR62010834	Chr13:6976497-6976829	110	11495	5.02	47.77	0.145	Chloroplast
CqPP2C95	AUR62008001	Chr14:1861050-1865336	420	44992.6	7.97	39.36	-0.098	Chloroplast
CqPP2C96	AUR62037293	Chr14:10060187-10067933	431	46764.6	8.17	36.12	-0.198	Chloroplast
CqPP2C97	AUR62026230	Chr14:22352215-22361480	337	37550.5	6.22	48.4	-0.21	Chloroplast
CqPP2C98	AUR62005488	Chr14:52584391-52587508	511	56831.8	8.46	55.99	-0.545	Nucleus
CqPP2C99	AUR62026989	Chr15:176886-183267	529	58758	6.69	49.08	-0.698	Endoplasmic reticulum
CqPP2C100	AUR62010018	Chr15:4390260-4396400	389	43011	8.69	43.79	-0.205	Cytosol
CqPP2C101	AUR62010140	Chr15:5683437-5700865	1501	167616	7.15	36.93	-0.327	Chloroplast
CqPP2C102	AUR62038883	Chr15:32599168-32608432	391	41669.6	6.33	47.01	-0.604	Nucleus
CqPP2C103	AUR62037352	Chr15:39792571-39798659	468	51164.6	5.07	44.31	-0.299	Chloroplast
CqPP2C104	AUR62025109	Chr15:51958205-51965657	583	63995.4	5.69	47.79	-0.349	Chloroplast
CqPP2C105	AUR62025110	Chr15:51991554-51996339	540	59082.8	4.85	44.21	-0.212	Chloroplast
CqPP2C106	AUR62025871	Chr16:19499442-19513876	197	22083.8	4.92	35.41	-0.616	Cytosol
CqPP2C107	AUR62015552	Chr16:69875467-69876771	281	31780.2	8.29	42.43	-0.479	Nucleus
CqPP2C108	AUR62019832	Chr16:71852353-71852688	111	11595.2	4.84	33.47	0.177	Chloroplast
CqPP2C109	AUR62019833	Chr16:71854275-71857402	240	26723	9.1	59.82	-0.486	Chloroplast
CqPP2C110	AUR62018745	Chr16:75551636-75559276	670	74038.6	5.37	42.99	-0.467	Nucleus
CqPP2C111	AUR62026336	Chr17:57834677-57837475	407	45126.4	5.73	40.44	-0.483	Nucleus
CqPP2C112	AUR62029785	Chr17:60281879-60284444	651	71739.5	5.1	47.11	-0.427	Nucleus
CqPP2C113	AUR62013133	Chr17:78437590-78443127	280	30463.2	6.75	37.47	-0.434	Nucleus
CqPP2C114	AUR62013008	Chr17:79766805-79773376	389	42921.9	8.19	44.57	-0.2	Cytosol
CqPP2C115	AUR62009580	Chr18:28739839-28742881	685	75661.9	5.45	41.32	-0.477	Nucleus
CqPP2C116	AUR62020044	Chr18:30207830-30210217	358	39410.4	4.78	43.4	-0.263	Cytosol
CqPP2C117	AUR62020159	Chr18:31330680-31334856	412	44588.6	5.88	47.86	-0.189	Chloroplast

## Sheet: Table S2
Table S2. The distribution of PP2C genes in Arabidopsis and quinoa
Subgroup of PP2C	Numbers of	Numbers of
Genes	AtPP2C	CqPP2C
A	9	14
B	6	8
C	7	8
D	9	14
E	12	17
F1	7	8
F2	6	6
G	6	9
H	3	6
I	2	4
J	2	2
K	4	3
L	2	4
Single branch 1	1	3
Single branch 2	1	2
Single branch 3	1	2
Single branch 4	1	2
Single branch 5	1	1
Single branch 6	0	3
Single branch 7	0	1

## Sheet: Table S3
Table S3. Conserved motifs in the amino acid sequences of CqPP2C proteins
Motif	Width Multilevel	consensus sequence
1	31	HHKLTPDDQFLILASDGLWDVMSNQEAVDIV
2	21	LIQGEDLYVANLGDSRAVLGR
3	15	TFFGVFDGHGGPGAA
4	15	GGLAVSRAIGDKYLK
5	21	DHKPDRPDERERIEAAGGRVI
6	21	LIEEALRRGSKDBITVIVVDL
7	41	MSLDVJRKAFSATEEGFLDLVKKLWKEKPZJASVGSCCLVG
8	41	VAIQLSSEHNASYESVREELRSLHPDDPHIVVLKHGVWRVK
9	41	GRQDGLLWYKDLGKHANGDFSMAVVQANSLLEDQSQIESGP
10	41	SSAPNREKAAKALVDAAVRAWKSKYPGSKTDDCTVVCLFLQ
11	29	BPVVRYGVTSVIGRRREMEDAHAVVPDLV
12	21	DWEKAJSKAFLKTDSEFLEKG
13	29	NPRGGPAKRLVEEALFRAAKKAGMRFSDL
14	8	SGSTAVTA
15	15	YVRBHLFRNJLKELE
16	29	VASVFTQQGAKGVNQDAAIVWZGYGSEBD
17	29	EYNRDPLLAKFRLREPIKRPILTAEPSIS
18	50	HELVPLAVLIGRELKSEKIEKPEISYGQAEKAKKGEDYYLVKTDCQRIPG
19	29	QLSVDHEPBTERKDIEDRGGFVSNMPGDV
20	8	VIAEPEIT

## Sheet: Table S4
Table S4. Ka/Ks of syntenic gene pairs in quinoa genome
Gene_1	Gene_2	Ka	Ks	Ka/Ks
CqPP2C5	CqPP2C22	0.0119803	0.0481742	0.248687
CqPP2C6	CqPP2C23	0.00747733	0.0815057	0.09174
CqPP2C7	CqPP2C20	0.048843	0.133563	0.365693
CqPP2C8	CqPP2C21	0.0714215	0.14323	0.498649
CqPP2C9	CqPP2C24	0.017917	0.0299719	0.597795
CqPP2C10	CqPP2C38	0.00461141	0.0873135	0.0528144
CqPP2C11	CqPP2C39	0.0116598	0.123627	0.094314
CqPP2C12	CqPP2C36	0.0567597	0.135622	0.418514
CqPP2C13	CqPP2C36	0.0567597	0.127408	0.445494
CqPP2C13	CqPP2C66	0.0430708	0.139823	0.308039
CqPP2C14	CqPP2C34	0.382675	1.9507	0.196173
CqPP2C15	CqPP2C33	0.405565	2.70859	0.149733
CqPP2C25	CqPP2C78	0.00497468	0.0612775	0.0811829
CqPP2C26	CqPP2C77	0.0829034	0.170491	0.486262
CqPP2C27	CqPP2C76	0.00886491	0.0626871	0.141415
CqPP2C28	CqPP2C75	0.0223828	0.131908	0.169685
CqPP2C29	CqPP2C74	0.00927656	0.126969	0.0730616
CqPP2C29	CqPP2C101	0.15438	2.05057	0.0752865
CqPP2C29	CqPP2C113	0.149095	2.22171	0.067108
CqPP2C30	CqPP2C32	0.0132041	0.167246	0.07895
CqPP2C30	CqPP2C64	0.302978	2.85594	0.106087
CqPP2C30	CqPP2C116	0.297875	NaN	NaN
CqPP2C31	CqPP2C63	0.373161	1.63519	0.228206
CqPP2C31	CqPP2C117	0.419081	1.60924	0.260422
CqPP2C32	CqPP2C64	0.297046	3.44211	0.0862976
CqPP2C32	CqPP2C116	0.300108	2.51857	0.119158
CqPP2C37	CqPP2C91	0.00815225	0.0456068	0.178751
CqPP2C40	CqPP2C90	0.0239827	0.141872	0.169045
CqPP2C41	CqPP2C88	0.0120424	0.123614	0.0974197
CqPP2C42	CqPP2C87	0.00727467	0.0358667	0.202826
CqPP2C43	CqPP2C86	0.0141391	0.0900196	0.157067
CqPP2C44	CqPP2C56	0.017559	0.138352	0.126916
CqPP2C44	CqPP2C94	0.460873	NaN	NaN
CqPP2C45	CqPP2C57	0.0604354	0.172234	0.350891
CqPP2C46	CqPP2C98	0.0256568	0.0859261	0.298591
CqPP2C47	CqPP2C95	0.0116138	0.0720966	0.161087
CqPP2C48	CqPP2C96	0.0231222	0.0813477	0.28424
CqPP2C49	CqPP2C97	0.0153234	0.114134	0.134258
CqPP2C50	CqPP2C81	0.0200451	0.0420548	0.476643
CqPP2C51	CqPP2C82	0.0140849	0.0793942	0.177405
CqPP2C52	CqPP2C80	0.0120754	0.0259019	0.466198
CqPP2C54	CqPP2C107	0.0653328	0.106863	0.611367
CqPP2C55	CqPP2C83	0.0168894	0.0815282	0.207161
CqPP2C56	CqPP2C94	0.502448	NaN	NaN
CqPP2C58	CqPP2C85	0.0110846	0.0865775	0.12803
CqPP2C59	CqPP2C84	0.013004	0.0482578	0.269469
CqPP2C60	CqPP2C79	0.0144932	0.0595902	0.243215
CqPP2C61	CqPP2C111	0.0181908	0.117851	0.154355
CqPP2C62	CqPP2C112	0.0218753	0.13671	0.160013
CqPP2C64	CqPP2C116	0.0374649	0.159836	0.234396
CqPP2C65	CqPP2C115	0.00696832	0.110016	0.0633393
CqPP2C67	CqPP2C71	0.00488999	0.0651699	0.0750346
CqPP2C68	CqPP2C72	0.0145051	0.0755752	0.19193
CqPP2C69	CqPP2C106	0.012663	0.0685212	0.184804
CqPP2C74	CqPP2C101	0.181059	2.55421	0.0708865
CqPP2C74	CqPP2C113	0.169525	3.53279	0.0479861
CqPP2C92	CqPP2C110	0.00652391	0.0605031	0.107828
CqPP2C93	CqPP2C109	0.0729145	0.226443	0.321999
CqPP2C94	CqPP2C108	0.0750365	0.222476	0.337279
CqPP2C100	CqPP2C114	0.00679891	0.0749219	0.0907467
CqPP2C63	CqPP2C117	0.0261442	0.129205	0.202346

## Sheet: Table S5
Table S5. Primers used for qRT-PCR in this study
Primer name	Forward sequence (5'-3')	Reverse sequence (5'-3')
CqTUB	TGAGAACGCAGATGAGTGTATG	GAAACGAAGACAGCAAGTGACA
CqPP2C5	GCTTGCTATTGGGAGAAACAGTTCTG	CGCTATTTCACCAGCAGTGTCAGC
CqPP2C30	GCGAGGATGTGCTTGATTAATGCC	ATTCCAACCTACTAACAACAAAACTAGCTC
CqPP2C44	GGGCAGGATTAAGTCGCAAGAGTTC	CCTTCTGGGCTGACTAAACAGAAAG
CqPP2C104	GTGCTGACGAATGAAGAAGCCTGTG	ACTCTCAAATAGGGCGGTGTTACCTC
CqPP2C105	CTCCAAGCTTGCTCTCCAGAAAGG	ATGTGATGCTTCTGAGAGCTGACAG
CqPP2C116	CCGGATGTTGAACAGATCACTGGTG	GGAGGACACCCGTTACGTTGTTAC

## Sheet: Table S6
Table S6. Primers for plasmid construction
Primer name	Forward sequence (5'-3')	Reverse sequence (5'-3')
CqPP2C5-AD	ggccagtgaattccacccgATGGAATCCTCTTCCTCCGACGA	tctgcagctcgagctcgatgATGTGATGCTTCTGAGAGCTGACAG
CqPP2C30-AD	ggccagtgaattccacccgATGGCGGGAATGTGTTGTGGTATTAA	tctgcagctcgagctcgatgATTCCAACCTACTAACAACAAAACTAG
CqPP2C44-AD	ggccagtgaattccacccgATGACACTAAGAGAAATCTCGTTG	tctgcagctcgagctcgatgCCTTCTGGGCTGACTAAACAGAAAG
CqPP2C104-AD	ggccagtgaattccacccgATGGAGTTTGTGGAGGAGATTCCG	tctgcagctcgagctcgatgACTCTCAAATAGGGCGGTGTTACC
CqPP2C105-AD	ggccagtgaattccacccgATGAAGACGGAGGATTCTTCTTTG	tctgcagctcgagctcgatgATGTGATGCTTCTGAGAGCTGACAG
CqPP2C116-AD	ggccagtgaattccacccgATGGAAATCAGACGGTTTAAATTCA	tctgcagctcgagctcgatgGAGGACACCCGTTACGTTGTTAC
CqSnRK2.1-BD	gccatggaggccgaattcccgATGGAGAGGTATGAAATAGTAAAAG	agttatgcggccgctgcaggCACTCATGCTTGCCTACTCCTGAG
CqSnRK2.4-BD	gccatggaggccgaattcccgATGGAGAGGTACGAAAATATGAAA	agttatgcggccgctgcaggCCTCACCAACTGATGAAGGCACAAC
CqSnRK2.6-BD	gccatggaggccgaattcccgATGGTTTTAGGAAATCTTGACAAGG	agttatgcggccgctgcaggCCAGAGTAGCAATGGGGATAATGTTG
CqSnRK2.9-BD	gccatggaggccgaattcccgATGGAGAGATATGAACCAATAAAGG	agttatgcggccgctgcaggCAGGACATCAAACACAACTGATGC
CqSnRK2.11-BD	gccatggaggccgaattcccgATGCATAACAGTGATCGTTATGAA	agttatgcggccgctgcaggCTTCTTTGGGATTGATTCCAACC
